# Supplementary material
Source: PubMed Central journal article supplement (PMC8015386)
Supplement: NIHMS1604817-supplement-Supplement1.pdf [file NIHMS1604817-supplement-Supplement1.pdf]

# **Evidence of Air Dispersion: HFPO-DA and PFOA in Ohio and West Virginia Surface Water and Soil Near a Fluoropolymer Production Facility**

## **Supporting Information**

Jason E. Galloway,<sup>†</sup> Anjelica V. P. Moreno,<sup>#</sup> Andrew B. Lindstrom,<sup>‡</sup> Mark J. Strynar,<sup>‡</sup> Seth Newton,<sup>‡</sup> Andrew A. May,<sup>#,§</sup> and Linda K. Weavers<sup>#,§,\*</sup>

<sup>†</sup> Department of Molecular Genetics, The Ohio State University, Columbus, Ohio 43210, United States

<sup>#</sup> Environmental Science Graduate Program, The Ohio State University, Columbus, Ohio 43210, United States

<sup>‡</sup> U.S. Environmental Protection Agency, Research Triangle Park, North Carolina 27711, United States

<sup>§</sup> Department of Civil, Environmental and Geodetic Engineering, The Ohio State University, Columbus, Ohio 43210, United States

\* Corresponding Author: weavers.1@osu.edu

## Table of Contents

|                                                                                                                                                  |     |
|--------------------------------------------------------------------------------------------------------------------------------------------------|-----|
| Materials .....                                                                                                                                  | S3  |
| Figure S1. Sampling locations and PFAS concentrations in surface waters from the second sampling trip .....                                      | S3  |
| Figure S2. Predicted wet+dry deposition rates from CALPUFF model output and measured soil concentrations from 2016 and 2018 sampling trips ..... | S4  |
| Table S1. Method performance .....                                                                                                               | S5  |
| Table S2. Duplicate comparison .....                                                                                                             | S5  |
| Table S3. Measured PFAS surface water concentration results from the first sampling trip .....                                                   | S6  |
| Table S4. Measured PFAS surface water concentration results from the second sampling trip .....                                                  | S7  |
| Table S5. Measured PFAS surface water concentration results from the third sampling trip .....                                                   | S8  |
| Table S6. PFASs concentrations in public water .....                                                                                             | S9  |
| Table S7. Measured PFAS soil concentration results from soil sampling trips .....                                                                | S9  |
| Table S8. Sample metadata from the first sampling trip .....                                                                                     | S10 |
| Table S9. Sample metadata from the second sampling trip .....                                                                                    | S11 |
| Table S10. Sample metadata from the third sampling trip .....                                                                                    | S12 |
| Table S11. Sample metadata for soil samples .....                                                                                                | S13 |

## Materials

Targeted PFAS – perfluorobutanoic acid (PFBA), perfluoropentanoic acid (PFPeA), perfluorohexanoic acid (PFHxA), perfluoroheptanoic acid (PFHpA), perfluorooctanoic acid (PFOA), perfluorononanoic acid (PFNA), perfluorodecanoic acid (PFDA), perfluorobutane sulfonic acid (PFBS), perfluorohexane sulfonic acid (PFHxS), and perfluorooctane sulfonic acid (PFOS) – were purchased from Wellington Laboratories (Guelph, Ontario, Canada), and HFPO-DA was obtained from Synquest Laboratories (Alachua, FL). Isotopically labeled PFASs used for internal standards (IS) were obtained from Wellington Laboratories. Deionized (DI) water was generated in-house using a Barnstead EasyPure UV/UF lab water system (Dubuque, IA).

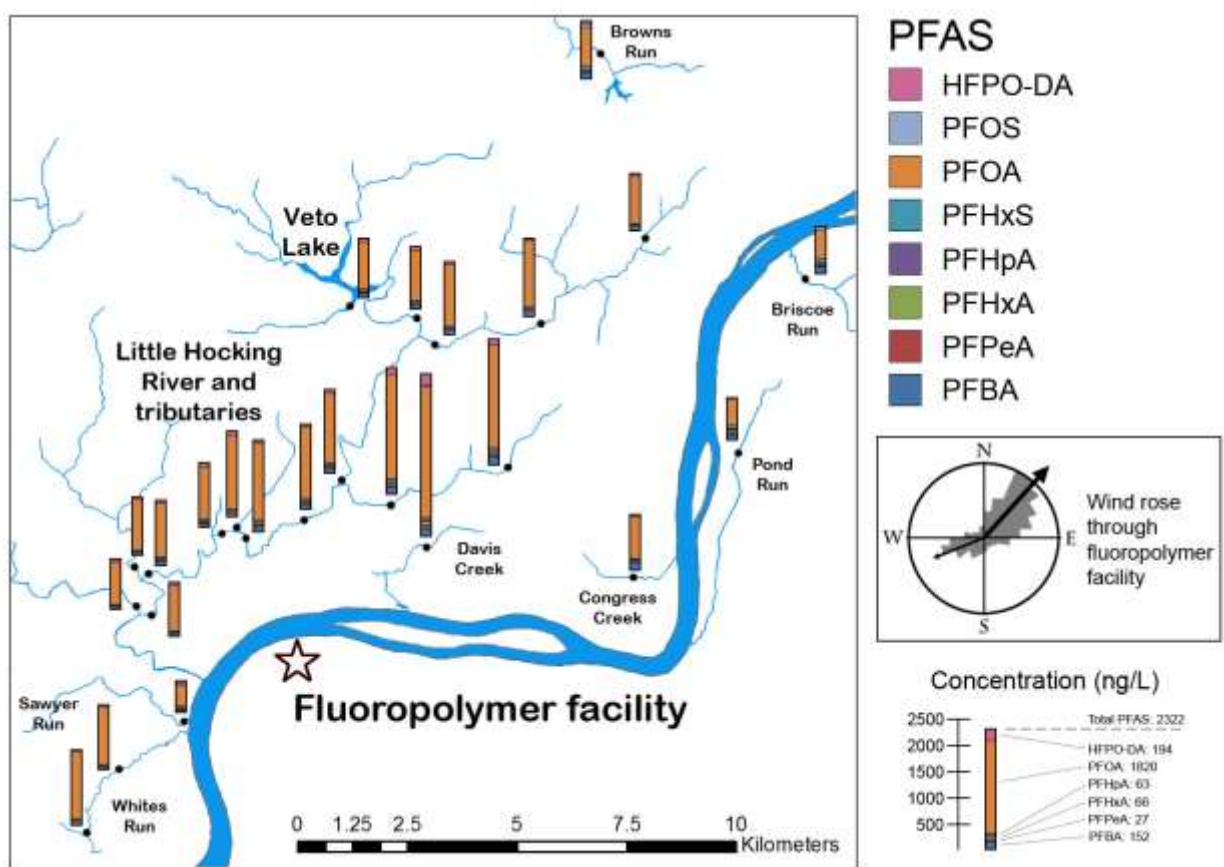

**Figure S1.** Sampling locations and PFAS concentrations in surface waters from the second sampling trip, July 12-13, 2016.

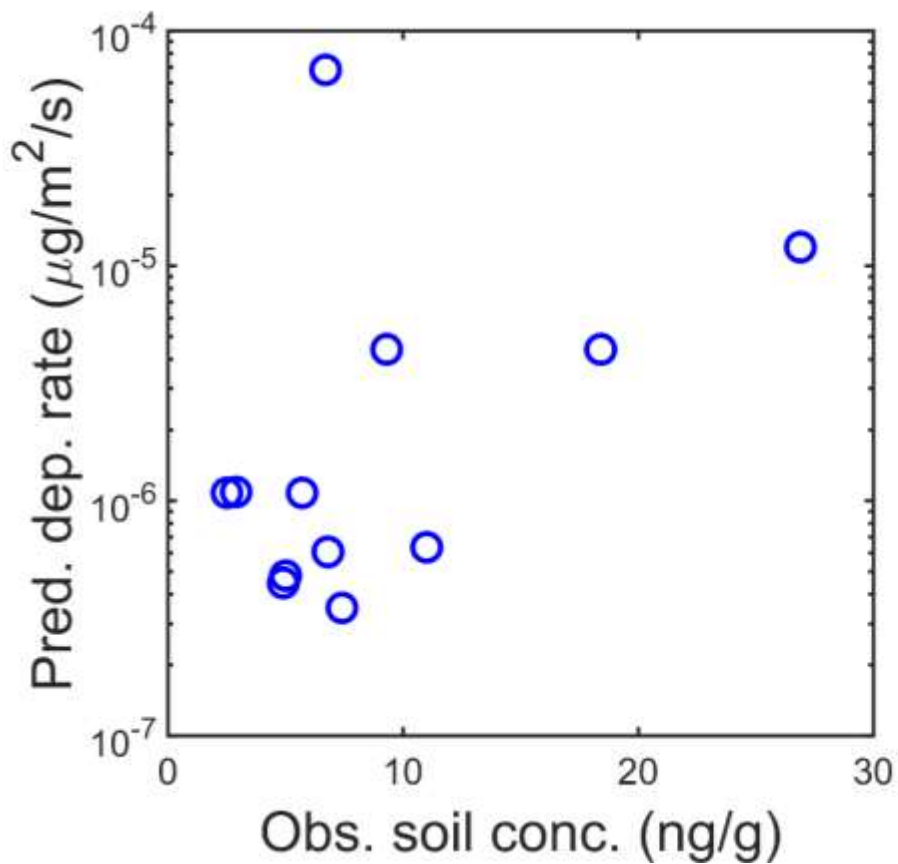

**Figure S2.** Predicted PFOA wet+dry deposition rates from CALPUFF model output and measured PFOA soil concentrations from 2016 and 2018 sampling trips. Predictions correspond to the exact locations of the soil samples. The value at [7 ng/g,  $6 \times 10^{-5} \mu\text{g}/\text{m}^2/\text{s}$ ] is a suspected outlier ( $p$ -value of slope = 0.14 with this point, or <0.001 without).

**Table S1.** Method performance.

|         | Sample Trip #1 |            |          |            | Sample Trip #2 |            |          |            | Sample Trip #3 |            |          |            |
|---------|----------------|------------|----------|------------|----------------|------------|----------|------------|----------------|------------|----------|------------|
|         | 25 ng/L        |            | 100 ng/L |            | 25 ng/L        |            | 100 ng/L |            | 25 ng/L        |            | 100 ng/L |            |
|         | ng/L           | % recovery | ng/L     | % recovery | ng/L           | % recovery | ng/L     | % recovery | ng/L           | % recovery | ng/L     | % recovery |
| PFBA    | 27.4           | 110        | 92.0     | 92.0       | 13.3           | 53.3       | 96.2     | 96.2       | 34.8           | 139        | 101      | 101        |
| PFPeA   | 27.5           | 110        | 92.3     | 92.3       | 13.0           | 52.1       | 104      | 104        | 37.1           | 149        | 106      | 106        |
| PFBS    | 27.4           | 110        | 89.5     | 89.5       | -              | -          | -        | -          | 34.5           | 138        | 184      | 184        |
| PFHxA   | 25.3           | 101        | 79.3     | 79.3       | 23.1           | 92.2       | 99.3     | 99.3       | 31.2           | 125        | 84.6     | 84.6       |
| PFHpA   | 26.8           | 107        | 79.3     | 79.3       | 19.9           | 79.5       | 106      | 106        | 15.8           | 63.0       | 132      | 132        |
| PFHxS   | 24.9           | 99.8       | 89.7     | 89.7       | -              | -          | 47.2     | 47.2       | 29.5           | 118        | 148      | 148        |
| PFOA    | 24.4           | 97.5       | 91.3     | 91.3       | 17.4           | 69.7       | 94.7     | 94.7       | 16.8           | 67.1       | 129      | 129        |
| PFNA    | 25.6           | 102        | 87.3     | 87.3       | 20.1           | 80.3       | 89.8     | 89.8       | 10.6           | 42.4       | 55.1     | 55.1       |
| PFOS    | 25.5           | 102        | 88.3     | 88.3       | 20.4           | 81.6       | 97.7     | 97.7       | 25.5           | 102        | 109      | 109        |
| PFDA    | 23.4           | 93.6       | 79.0     | 79.0       | 17.7           | 70.7       | 108      | 108        | 27.2           | 109        | 221      | 221        |
| HFPO-DA | -              | -          | -        | -          | -              | -          | -        | -          | 28.7           | 115        | 78.2     | 78.2       |

**Table S2.** Duplicate comparison.

| Description                    | Date    | PFOA             |                  |              | HFPO-DA          |                  |              |
|--------------------------------|---------|------------------|------------------|--------------|------------------|------------------|--------------|
|                                |         | Sample #1 (ng/L) | Sample #2 (ng/L) | % difference | Sample #1 (ng/L) | Sample #2 (ng/L) | % difference |
| Lee Creek                      | 6/6/16  | 50.9             | 65.3             | 24.8         | *                | *                | -            |
| Sawyer Run (Ohio River)        | 6/8/16  | *                | *                | -            | -                | *                | -            |
| Vienna Island (Ohio River)     | 6/9/16  | *                | *                | -            | -                | -                | -            |
| Little Hocking #4              | 7/12/16 | 1770             | 1220             | 36.8         | 86               | 37               | 79.7         |
| Veto Lake                      | 12/1/16 | 412              | 321              | 24.8         | 31.0             | 37.5             | 19.0         |
| Mill Branch                    | 12/2/16 | 480              | 636              | 28.0         | 81.0             | 116              | 35.5         |
| Warren Elementary <sup>1</sup> | 12/2/16 | *                | *                | -            | -                | -                | -            |
| Williams Creek                 | 12/3/16 | 55.5             | 65.1             | 15.9         | *                | 10.7             | -            |
| Soil                           |         | Sample #1 (ng/g) | Sample #2 (ng/g) | % difference | Sample #1 (ng/g) | Sample #2 (ng/g) | % difference |
| Veto Road                      | 12/2/16 | *                | *                | -            | -                | -                | -            |
| Veto Lake                      | 3/25/18 | 9.3              | 10.3             | 10.2         | 1.0              | 1.2              | 18.2         |

<sup>1</sup> Public water, Warren Community Water.

\* Detected but below the LOQ of 10 ng/L for water or 1 ng/g for soil.

- Not detected.

**Table S3.** Measured PFAS surface water concentration results from the first sampling trip, June 6-9, 2016.

| Description                             | PFBA<br>ng/L | PFPeA<br>ng/L | PFBS<br>ng/L | PFHxA<br>ng/L | PFHpA<br>ng/L | PFHxS<br>ng/L | PFOA<br>ng/L | PFNA<br>ng/L | PFOS<br>ng/L | PFDA<br>ng/L | HFPO-<br>DA<br>ng/L |
|-----------------------------------------|--------------|---------------|--------------|---------------|---------------|---------------|--------------|--------------|--------------|--------------|---------------------|
| <b>Ohio River Samples</b>               |              |               |              |               |               |               |              |              |              |              |                     |
| Crab Creek                              | *            | *             | *            | *             | *             | *             | 15.0         | *            | *            | *            | *                   |
| Lakin                                   | *            | *             | *            | *             | *             | *             | 13.4         | *            | *            | *            | *                   |
| Pomeroy                                 | *            | *             | *            | *             | *             | *             | 12.3         | *            | *            | *            | 10.9                |
| Brinker Run<br>outflow                  | *            | *             | *            | *             | *             | *             | *            | *            | *            | *            | *                   |
| Foam in river                           | *            | *             | *            | *             | *             | *             | 13.5         | *            | *            | *            | *                   |
| Letart                                  | *            | *             | *            | *             | *             | *             | *            | *            | *            | *            | *                   |
| Lee Creek<br>outflow                    | *            | *             | *            | *             | *             | *             | *            | *            | *            | *            | *                   |
| Upstream from<br>Lee Creek              | *            | *             | *            | *             | *             | *             | *            | *            | *            | *            | *                   |
| Tuppers Plains                          | *            | *             | *            | *             | *             | *             | *            | *            | *            | *            | 10.0                |
| Lubeck                                  | *            | *             | *            | *             | *             | *             | *            | -            | *            | *            | -                   |
| Sawyer Run                              | *            | *             | *            | *             | *             | *             | *            | *            | *            | *            | -                   |
| Sawyer Run<br>(dup.)                    | *            | *             | *            | *             | *             | *             | *            | *            | *            | *            | *                   |
| Belpre                                  | *            | *             | *            | *             | *             | *             | *            | *            | *            | *            | -                   |
| Vienna Island                           | *            | *             | *            | *             | *             | *             | *            | *            | *            | *            | -                   |
| Vienna Island<br>(dup.)                 | *            | *             | *            | *             | *             | *             | *            | *            | *            | -            | -                   |
| Marietta                                | *            | *             | *            | *             | *             | *             | *            | *            | *            | *            | -                   |
| Newport                                 | 10.9         | *             | *            | *             | *             | *             | *            | *            | *            | *            | -                   |
| <b>Tributaries Near Known Landfills</b> |              |               |              |               |               |               |              |              |              |              |                     |
| Brinker Run <sup>1</sup>                | *            | *             | *            | *             | *             | *             | 103          | *            | -            | *            | -                   |
| Lee Creek <sup>2</sup>                  | *            | *             | *            | *             | *             | *             | 50.9         | *            | *            | *            | *                   |
| Lee Creek <sup>2</sup><br>(dup.)        | *            | *             | *            | *             | *             | *             | 65.3         | *            | *            | *            | *                   |
| Pine Run <sup>2</sup>                   | *            | *             | *            | *             | *             | *             | 189          | *            | *            | *            | *                   |
| Vaughts Run <sup>3</sup>                | 27.1         | 16.7          | *            | 19.8          | 33.8          | *             | 1250         | *            | *            | *            | 71.2                |
| <b>Other</b>                            |              |               |              |               |               |               |              |              |              |              |                     |
| Little Kanawha<br>River                 | *            | *             | *            | *             | *             | *             | 22.6         | *            | *            | *            | -                   |
| E. Fork Little<br>Hocking               | 10.4         | 15.5          | *            | 14.6          | 24.0          | *             | 463          | *            | *            | *            | 59.4                |
| W. Fork Little<br>Hocking               | *            | *             | *            | *             | *             | *             | 209          | *            | -            | *            | *                   |
| Muskingum<br>River                      | *            | *             | *            | *             | *             | *             | *            | *            | *            | *            | -                   |

<sup>1</sup> Influenced by Letart Landfill. <sup>2</sup> Influenced by Dry Run Landfill. <sup>3</sup> Influenced by Local Landfill.

\* Detected but below the LOQ of 10 ng/L.

- Not detected.

**Table S4.** Measured PFAS surface water concentration results from the second sampling trip, July 12-13, 2016.

| Description               | PFBA<br>ng/L | PFPeA<br>ng/L | PFBS<br>ng/L | PFHxA<br>ng/L | PFHpA<br>ng/L | PFHxS<br>ng/L | PFOA<br>ng/L | PFNA<br>ng/L | PFOS<br>ng/L | PFDA<br>ng/L | HFPO-<br>DA<br>ng/L |
|---------------------------|--------------|---------------|--------------|---------------|---------------|---------------|--------------|--------------|--------------|--------------|---------------------|
| Whites Run #1             | 36.0         | -             | -            | 26.8          | 32.2          | -             | 1120         | -            | -            | -            | 19.1                |
| Whites Run #2             | 57.5         | *             | -            | 34.0          | 38.0          | -             | 1290         | -            | -            | -            | 22.7                |
| Sawyer Run #1             | 31.8         | 10.1          | -            | 13.9          | *             | -             | 421          | -            | 10.4         | -            | 39.2                |
| West Fork LH              | 41.0         | -             | -            | 18.6          | 21.0          | -             | 838          | -            | -            | -            | 49.1                |
| LH #1                     | 50.5         | *             | -            | 20.3          | 19.2          | -             | 902          | -            | *            | -            | 53.1                |
| Little West Branch        | 43.0         | *             | -            | 22.1          | 22.3          | -             | 988          | -            | *            | -            | 36.5                |
| LH #2                     | 86.3         | 16.0          | -            | 32.8          | 23.7          | -             | 1040         | -            | *            | -            | 60.8                |
| LH #3                     | 74.2         | 12.0          | -            | 30.4          | 19.5          | -             | 1030         | -            | -            | -            | 71.8                |
| Long Brook                | 68.4         | *             | -            | 39.0          | 33.6          | -             | 1430         | -            | -            | -            | 84.3                |
| LH #4                     | 136          | 25.7          | -            | 56.3          | 59.6          | -             | 1770         | -            | *            | -            | 86.2                |
| LH #4 (dup.)              | 85.6         | 11.8          | -            | 39.3          | 36.0          | -             | 1220         | -            | *            | -            | 36.8                |
| LH #5                     | 104          | 16.7          | -            | 45.3          | 40.2          | -             | 1390         | -            | *            | -            | 41.5                |
| Veto Lake                 | 95.2         | 14.4          | -            | 34.4          | 25.7          | -             | 932          | -            | *            | -            | 52.6                |
| LH #6                     | 91.8         | 15.2          | -            | 40.1          | 42.4          | -             | 1360         | -            | -            | -            | 70.0                |
| Mill Branch #1            | 134          | 19.9          | -            | 71.3          | 65.9          | -             | 2040         | -            | -            | -            | 115                 |
| Davis Creek               | 203          | 43.1          | -            | 95.0          | 93.7          | -             | 2570         | -            | 13.0         | -            | 227                 |
| Mill Branch #2            | 151          | 22.0          | -            | 71.7          | 72.9          | -             | 2030         | -            | *            | -            | 88.5                |
| LH #7                     | 91.0         | *             | -            | 30.1          | 36.2          | -             | 987          | -            | *            | -            | 56.8                |
| E. Branch Tributary<br>#1 | 90.9         | *             | -            | 39.1          | 32.2          | -             | 1200         | -            | -            | -            | 37.4                |
| E. Branch Tributary<br>#2 | 108          | *             | -            | 34.8          | 34.5          | -             | 1290         | -            | -            | -            | 44.2                |
| E. Branch Tributary<br>#3 | 80.9         | -             | -            | 22.3          | 19.2          | -             | 962          | -            | -            | -            | 24.8                |
| Browns Run                | 106          | *             | -            | 26.1          | 18.8          | 78.4          | 781          | -            | 71.9         | -            | 30.4                |
| Briscoe Run               | 118          | 28.7          | -            | 35.8          | 30.5          | 79.0          | 566          | -            | 58.3         | -            | -                   |
| Pond Run                  | 90.0         | 65.7          | -            | 43.2          | 17.8          | 64.5          | 496          | -            | 22.1         | -            | -                   |
| Congress Creek            | 144          | 11.0          | -            | 26.4          | 24.5          | -             | 849          | -            | 20.0         | -            | -                   |

\* Detected but below the LOQ of 10 ng/L.

- Not detected.

**Table S5.** Measured PFAS surface water concentration results from the third sampling trip, December 1-3, 2016.

| Description                 | PFBA<br>ng/L | PFPeA<br>ng/L | PFBS<br>ng/L | PFHxA<br>ng/L | PFHpA<br>ng/L | PFHxS<br>ng/L | PFOA<br>ng/L | PFNA<br>ng/L | PFOS<br>ng/L | PFDA<br>ng/L | HFPO-<br>DA<br>ng/L |
|-----------------------------|--------------|---------------|--------------|---------------|---------------|---------------|--------------|--------------|--------------|--------------|---------------------|
| Little Hocking              | 19.9         | 10.6          | *            | 17.3          | 35.9          | *             | 1110         | *            | *            | *            | 129                 |
| Long Brook                  | *            | *             | *            | 10.8          | *             | -             | 516          | -            | -            | -            | 24.7                |
| Veto Lake                   | 15.9         | *             | *            | 11.3          | 10.4          | *             | 412          | *            | -            | -            | 31.0                |
| Veto Lake (dup.)            | 10.1         | *             | *            | *             | 11.1          | -             | 321          | *            | *            | -            | 37.5                |
| Buffalo Run                 | *            | *             | -            | *             | -             | -             | 157          | *            | *            | -            | 12.9                |
| S. Branch Wolf Creek #1     | 11.2         | *             | *            | *             | -             | *             | 98.5         | *            | -            | -            | 14.4                |
| S. Branch Wolf Creek #2     | *            | *             | *            | *             | *             | -             | 135          | -            | -            | -            | *                   |
| S. Branch Wolf Creek #3     | 17.0         | *             | *            | 13.8          | *             | *             | 147          | *            | -            | -            | 42.1                |
| S. Branch Wolf Creek #4     | *            | *             | -            | *             | *             | -             | 151          | *            | -            | -            | *                   |
| W. Branch Wolf Creek        | *            | *             | *            | *             | *             | -             | 22.4         | *            | -            | -            | *                   |
| Coal Run                    | *            | *             | -            | *             | -             | *             | 17.7         | -            | -            | -            | *                   |
| W. Branch Little Hocking #1 | *            | *             | -            | *             | -             | -             | 32.5         | *            | -            | -            | *                   |
| W. Branch Little Hocking #2 | *            | *             | -            | *             | -             | -             | 57.9         | -            | -            | -            | *                   |
| Big Run (OH)                | *            | *             | *            | *             | 11.4          | -             | 969          | *            | *            | -            | 16.8                |
| Davis Creek                 | 10.1         | *             | *            | 17.0          | 31.7          | 11.3          | 1310         | *            | 10.7         | -            | 137                 |
| Congress Creek              | 18.1         | 10.8          | *            | 11.9          | 15.1          | -             | 234          | *            | *            | -            | 24.3                |
| Mill Branch                 | 12.6         | *             | *            | 16.0          | *             | -             | 480          | *            | -            | -            | 81.0                |
| Mill Branch (dup.)          | 12.1         | *             | *            | 14.4          | 14.4          | -             | 636          | *            | -            | -            | 116                 |
| East Branch tributary #1    | *            | *             | *            | *             | *             | -             | 876          | *            | -            | -            | 16.5                |
| East Branch tributary #2    | *            | *             | *            | *             | *             | *             | 293          | *            | -            | -            | *                   |
| Hanna Road creek            | *            | *             | *            | *             | *             | *             | 201          | *            | *            | -            | 18.0                |
| Browns Run                  | 10.2         | *             | *            | *             | *             | 14.4          | 167          | *            | 14.0         | *            | 17.4                |
| Halfway Run                 | *            | *             | *            | *             | *             | *             | 96.0         | 24.2         | *            | *            | *                   |
| Indian Run                  | *            | *             | *            | *             | -             | *             | 56.3         | *            | -            | -            | *                   |
| Tupper Creek tributary      | *            | *             | *            | *             | -             | *             | 31.1         | *            | -            | -            | *                   |
| Rainbow Creek               | *            | *             | -            | *             | -             | -             | 42.1         | *            | -            | -            | *                   |
| Cat Creek                   | *            | *             | -            | *             | -             | -             | 35.1         | -            | -            | -            | *                   |
| Duck Creek tributary #1     | *            | *             | -            | *             | -             | -             | *            | *            | -            | -            | *                   |
| Duck Creek tributary #2     | *            | *             | *            | *             | *             | *             | 54.3         | *            | *            | -            | *                   |
| Sugar Creek                 | *            | -             | -            | *             | -             | -             | *            | *            | -            | -            | -                   |
| Eightmile Creek             | *            | *             | *            | *             | -             | *             | 14.1         | *            | *            | -            | *                   |
| Big Run (WV)                | *            | *             | *            | *             | -             | *             | 126          | *            | -            | -            | *                   |
| Little Eightmile Creek      | *            | -             | -            | *             | -             | -             | *            | -            | -            | -            | -                   |
| Fifteenmile Creek           | *            | *             | -            | *             | *             | -             | 14.5         | -            | -            | *            | -                   |
| Wingett Run                 | *            | -             | -            | *             | -             | -             | *            | -            | -            | -            | -                   |
| Mill Run                    | *            | *             | *            | *             | -             | *             | 32.5         | *            | *            | -            | *                   |
| Williams Creek              | *            | *             | *            | *             | *             | *             | 55.5         | *            | -            | -            | *                   |
| Williams Creek (dup.)       | 10.3         | *             | *            | *             | *             | *             | 65.1         | *            | -            | -            | 10.7                |
| Briscoe Run                 | 10.8         | 17.5          | 28.0         | 19.6          | 29.4          | 10.1          | 146          | *            | 19.5         | -            | *                   |
| Pond Run                    | *            | *             | *            | *             | *             | *             | 74.4         | *            | -            | -            | 22.5                |

\* Detected but below the LOQ of 10 ng/L.

- Not detected.



**Table S6.** Measured PFAS concentrations in drinking water samples from the three sampling trips. Each private well is located more than 27 kilometers from fluoropolymer production facility, in the direction of prevailing winds to the northeast.

| Description                              | PFBA<br>ng/L | PFPeA<br>ng/L | PFBS<br>ng/L | PFHxA<br>ng/L | PFHpA<br>ng/L | PFHxS<br>ng/L | PFOA<br>ng/L | PFNA<br>ng/L | PFOS<br>ng/L | PFDA<br>ng/L | HFPO-<br>DA<br>ng/L |
|------------------------------------------|--------------|---------------|--------------|---------------|---------------|---------------|--------------|--------------|--------------|--------------|---------------------|
| Washington Co. Library <sup>1</sup>      | *            | *             | *            | *             | *             | *             | *            | *            | *            | *            | -                   |
| Little Hocking P.O. <sup>2</sup>         | -            | -             | -            | -             | -             | -             | -            | -            | -            | -            | -                   |
| Barlow Library <sup>2</sup>              | *            | *             | -            | *             | -             | -             | *            | -            | -            | -            | *                   |
| Watertown P.O. <sup>2</sup>              | *            | *             | -            | *             | -             | -             | *            | *            | *            | -            | -                   |
| Warren Elementary <sup>3</sup>           | *            | *             | *            | *             | -             | *             | *            | *            | *            | -            | -                   |
| Warren Elementary <sup>3</sup><br>(dup.) | *            | *             | *            | *             | -             | -             | *            | *            | -            | -            | -                   |
| Devola private well                      | *            | *             | *            | *             | -             | *             | 28.0         | *            | -            | -            | -                   |
| Lowell private well                      | *            | *             | *            | *             | -             | *             | 23.3         | *            | -            | -            | -                   |

<sup>1</sup> City of Marietta. <sup>2</sup> Little Hocking Water Association. <sup>3</sup> Warren Community Water.

\* Detected but below the LOQ of 10 ng/L.

- Not detected.

**Table S7.** Measured PFAS soil concentration results from soil sampling trips (ng/g dry weight). Distance is measured from fluoropolymer production facility.

| Year | Description      | Distance<br>(km) | PFBA<br>ng/g | PFPeA<br>ng/g | PFHxA<br>ng/g | PFHpA<br>ng/g | PFOA<br>ng/g | PFNA<br>ng/g | PFDA<br>ng/g | HFPO-<br>DA<br>ng/g |
|------|------------------|------------------|--------------|---------------|---------------|---------------|--------------|--------------|--------------|---------------------|
| 2004 | Little Hocking A |                  | 3.57         | 1.17          | 8.37          | 41.5          | 57.3         | *            | 2.01         | -                   |
|      | Little Hocking B |                  | 3.29         | *             | 18.1          | 104           | 66.2         | *            | 3.34         | -                   |
|      | Little Hocking C |                  | 3.78         | 2.15          | 12.9          | 57.9          | 59.1         | *            | 2.65         | -                   |
| 2016 | Drag Strip Road  | 4.0              | *            | 6.29          | 1.65          | 1.32          | 26.9         | 1.63         | 1.69         | 3.20                |
|      | Veto Lake        | 8.0              | 1.22         | 48.8          | 3.63          | 7.65          | 18.4         | *            | 1.45         | 8.14                |
|      | Veto Road        | 13.0             | -            | -             | -             | -             | *            | -            | *            | -                   |
|      | Veto Road (dup.) | 13.0             | *            | -             | -             | *             | *            | -            | *            | -                   |
|      | Strouds Run      | 15.3             | *            | 9.99          | *             | *             | 5.70         | *            | *            | *                   |
|      | Lookout Park     | 24.0             | 1.01         | -             | -             | *             | 2.52         | *            | *            | -                   |
|      | Archers Fork #1  | 35.3             | *            | -             | *             | *             | 6.77         | *            | *            | -                   |
|      | Archers Fork #2  | 48.1             | *            | -             | *             | *             | 4.96         | *            | *            | -                   |
| 2018 | LHWA             | 1.3              | 3.52         | 14.3          | 3.06          | 3.10          | 6.68         | 1.92         | 1.32         | 3.09                |
|      | Veto Lake        | 8.0              | *            | 3.66          | *             | *             | 9.30         | *            | *            | 1.00                |
|      | Veto Lake (dup.) | 8.0              | *            | 15.4          | 1.40          | 1.30          | 10.3         | *            | 1.31         | 1.20                |
|      | Watertown        | 24.3             | *            | 1.37          | *             | *             | 2.86         | -            | *            | -                   |
|      | Beverly          | 32.1             | *            | 4.11          | *             | *             | 11.0         | *            | *            | -                   |
|      | L. Olive Green   |                  |              |               |               |               |              |              |              |                     |
|      | Creek            | 39.9             | *            | 3.18          | *             | *             | 4.88         | *            | *            | -                   |
|      | Reinersville     | 45.4             | *            | 4.42          | *             | *             | 7.35         | *            | *            | -                   |

\* Detected but below the LOQ of 1 ng/g.

- Not detected.

**Table S8.** Sample metadata from the first sampling trip, June 6-9, 2016.

| No. | Description             | Date         | Time     | Latitude | Longitude |
|-----|-------------------------|--------------|----------|----------|-----------|
| 01  | Crab Creek              | June 6, 2016 | 8:25 AM  | 38.76207 | -82.20162 |
| 02  | Lakin                   | June 6       | 10:04 AM | 38.96797 | -82.09248 |
| 03  | Pomeroy                 | June 6       | 10:49 AM | 39.02617 | -82.03087 |
| 04  | Brinker Run outflow     | June 6       | 12:48 PM | 38.91000 | -81.91994 |
| 05  | Foam in river           | June 6       | 1:04 PM  | 38.90876 | -81.92217 |
| 06  | Brinker Run             | June 6       | 1:15 PM  | 38.90851 | -81.92284 |
| 07  | Letart                  | June 6       | 2:28 PM  | 38.89235 | -81.92825 |
| 08  | Lee Creek outflow       | June 6       | 4:48 PM  | 39.14891 | -81.74234 |
| 09  | Lee Creek               | June 6       | 4:58 PM  | 39.15089 | -81.73980 |
| 10  | Lee Creek (dup.)        | -            | -        | -        | -         |
| 11  | Upstream from Lee Creek | June 6       | 5:21 PM  | 39.15760 | -81.74568 |
| 12  | Pine Run                | June 6       | 7:09 PM  | 39.18248 | -81.70824 |
| 13  | Tuppers Plains          | June 8, 2016 | 8:47 AM  | 39.08101 | -81.79697 |
| 14  | Lubeck                  | June 8       | 11:31 AM | 39.23388 | -81.68987 |
| 15  | Sawyer Run              | June 8       | 12:45 PM | 39.25474 | -81.69424 |
| 16  | Sawyer Run (dup.)       | -            | -        | -        | -         |
| 17  | Vaughts Run             | June 8       | 1:27 PM  | 39.23783 | -81.66928 |
| 18  | Belpre                  | June 8       | 2:38 PM  | 39.26714 | -81.58015 |
| 19  | Little Kanawha River    | June 8       | 3:52 PM  | 39.24797 | -81.52357 |
| 20  | E. Fork Little Hocking  | June 8       | 4:37 PM  | 39.27692 | -81.70723 |
| 21  | W. Fork Little Hocking  | June 8       | 4:48 PM  | 39.27902 | -81.71330 |
| 22  | Vienna Island           | June 9, 2016 | 8:00 AM  | 39.35587 | -81.53681 |
| 23  | Vienna Island (dup.)    | -            | -        | -        | -         |
| 24  | Marietta                | June 9       | 9:17 AM  | 39.39790 | -81.47302 |
| 25  | Newport                 | June 9       | 11:22 AM | 39.39679 | -81.20914 |
| 26  | Washington Co. Library  | June 9       | 12:26 PM | 39.42426 | -81.45776 |
| 27  | Muskingum River         | June 9       | 12:59 PM | 39.43301 | -81.47214 |

**Table S9.** Sample metadata from the second sampling trip, July 12-13, 2016.

| No. | Description            | Date          | Time     | Latitude | Longitude |
|-----|------------------------|---------------|----------|----------|-----------|
| 01  | Whites Run #1          | July 12, 2016 | 9:17 AM  | 39.24466 | -81.71711 |
| 02  | Whites Run #2          | July 12       | 9:39 AM  | 39.23133 | -81.72577 |
| 03  | Sawyer Run #1          | July 12       | 10:22 AM | 39.25447 | -81.69927 |
| 04  | Sawyer Run #1 (dup.)   | -             | -        | -        | -         |
| 05  | Sawyer Run #2          | July 12       | 10:49 AM | 39.26103 | -81.72844 |
| 06  | West Fork LH           | July 12       | 12:02 PM | 39.27911 | -81.71337 |
| 07  | LH #1                  | July 12       | 12:20 PM | 39.27691 | -81.70724 |
| 08  | Little West Branch     | July 12       | 12:46 PM | 39.28698 | -81.71290 |
| 09  | LH #2                  | July 12       | 12:59 PM | 39.28558 | -81.70922 |
| 10  | LH #3                  | July 12       | 1:55 PM  | 39.29399 | -81.68947 |
| 11  | Long Brook             | July 12       | 2:23 PM  | 39.29475 | -81.68580 |
| 12  | LH #4                  | July 12       | 2:50 PM  | 39.29283 | -81.68298 |
| 13  | LH #4 (dup.)           | -             | -        | -        | -         |
| 14  | LH #5                  | July 12       | 4:30 PM  | 39.29639 | -81.66705 |
| 15  | Veto Lake              | July 12       | 5:59 PM  | 39.34101 | -81.65482 |
| 16  | Little Hocking P. O.   | July 13, 2016 | 4:17 PM  | 39.26155 | -81.69953 |
| 17  | LH #6                  | July 13       | 4:42 PM  | 39.30514 | -81.65685 |
| 18  | Mill Branch #1         | July 13       | 4:52 PM  | 39.29965 | -81.64342 |
| 19  | Davis Creek            | July 13       | 5:02 PM  | 39.29064 | -81.63391 |
| 20  | Davis Creek (dup.)     | -             | -        | -        | -         |
| 21  | Mill Branch #2         | July 13       | 5:22 PM  | 39.30770 | -81.61228 |
| 22  | LH #7                  | July 13       | 5:43 PM  | 39.33668 | -81.63584 |
| 23  | E. Branch Tributary #1 | July 13       | 5:54 PM  | 39.33463 | -81.63522 |
| 24  | E. Branch Tributary #2 | July 13       | 6:14 PM  | 39.33783 | -81.60300 |
| 25  | E. Branch Tributary #3 | July 13       | 6:25 PM  | 39.35571 | -81.57511 |
| 26  | Browns Run             | July 13       | 6:46 PM  | 39.39378 | -81.58715 |
| 27  | Briscoe Run            | July 13       | 7:23 PM  | 39.34695 | -81.53130 |
| 28  | Pond Run               | July 13       | 7:36 PM  | 39.31056 | -81.54974 |
| 29  | Congress Creek         | July 13       | 7:57 PM  | 39.28463 | -81.57816 |

**Table S10.** Sample metadata from the third sampling trip, December 1-3, 2016.

| No. | Description                 | Date             | Time     | Latitude | Longitude |
|-----|-----------------------------|------------------|----------|----------|-----------|
| 01  | Little Hocking              | December 1, 2016 | 8:58 AM  | 39.29453 | -81.68806 |
| 02  | Long Brook                  | December 1       | 9:16 AM  | 39.31497 | -81.67335 |
| 03  | Veto Lake                   | December 1       | 9:41 AM  | 39.34287 | -81.65352 |
| 04  | Veto Lake (dup.)            | -                | -        | -        | -         |
| 05  | Buffalo Run                 | December 1       | 10:26 AM | 39.36601 | -81.65132 |
| 06  | Barlow Library              | December 1       | 10:59 AM | 39.39548 | -81.66668 |
| 07  | S. Branch Wolf Creek #1     | December 1       | 11:10 AM | 39.40085 | -81.66523 |
| 08  | S. Branch Wolf Creek #2     | December 1       | 11:57 AM | 39.46452 | -81.63381 |
| 09  | Watertown P.O.              | December 1       | 12:10 PM | 39.46672 | -81.63335 |
| 10  | S. Branch Wolf Creek #3     | December 1       | 12:27 PM | 39.52470 | -81.65861 |
| 11  | S. Branch Wolf Creek #4     | December 1       | 1:04 PM  | 39.42754 | -81.70965 |
| 12  | W. Branch Wolf Creek        | December 1       | 1:34 PM  | 39.47943 | -81.73095 |
| 13  | Coal Run                    | December 1       | 2:09 PM  | 39.45974 | -81.82304 |
| 14  | W. Branch Little Hocking #1 | December 1       | 2:59 PM  | 39.38334 | -81.78522 |
| 15  | W. Branch Little Hocking #2 | December 1       | 3:32 PM  | 39.35959 | -81.73612 |
| 16  | Big Run (OH)                | December 1       | 4:06 PM  | 39.30150 | -81.72783 |
| 17  | Davis Creek                 | December 1       | 4:26 PM  | 39.29057 | -81.63395 |
| 18  | Congress Creek              | December 1       | 4:59 PM  | 39.28467 | -81.57794 |
| 19  | Mill Branch                 | December 2, 2016 | 7:54 AM  | 39.30763 | -81.61226 |
| 20  | Mill Branch (dup.)          | -                | -        | -        | -         |
| 21  | East Branch tributary #1    | December 2       | 8:19 AM  | 39.33774 | -81.60314 |
| 22  | East Branch tributary #2    | December 2       | 8:45 AM  | 39.35566 | -81.57512 |
| 23  | Hanna Road creek            | December 2       | 9:21 AM  | 39.38255 | -81.50297 |
| 24  | Warren Elementary           | December 2       | 10:02 AM | 39.39388 | -81.55533 |
| 25  | Warren Elementary (dup.)    | -                | -        | -        | -         |
| 26  | Browns Run                  | December 2       | 10:21 AM | 39.39375 | -81.58713 |
| 27  | Halfway Run                 | December 2       | 10:55 AM | 39.42693 | -81.57279 |
| 28  | Indian Run                  | December 2       | 12:43 PM | 39.43417 | -81.47981 |
| 29  | Devola private well         | December 2       | 1:05 PM  | 39.46812 | -81.46629 |
| 30  | Tupper Creek tributary      | December 2       | 1:15 PM  | 39.47305 | -81.46418 |
| 31  | Lowell private well         | December 2       | 1:35 PM  | 39.52667 | -81.50190 |
| 32  | Rainbow Creek               | December 2       | 2:00 PM  | 39.49830 | -81.52533 |
| 33  | Cat Creek                   | December 2       | 2:24 PM  | 39.54458 | -81.51777 |
| 34  | Duck Creek tributary #1     | December 2       | 3:06 PM  | 39.52016 | -81.41509 |
| 35  | Duck Creek tributary #2     | December 2       | 3:38 PM  | 39.42813 | -81.41411 |
| 36  | Sugar Creek                 | December 2       | 4:10 PM  | 39.46746 | -81.39415 |
| 37  | Eightmile Creek             | December 2       | 4:36 PM  | 39.41497 | -81.34840 |
| 38  | Big Run (WV)                | December 3, 2016 | 8:14 AM  | 39.33147 | -81.47401 |
| 39  | Little Eightmile Creek      | December 3       | 8:49 AM  | 39.44720 | -81.34073 |
| 40  | Fifteenmile Creek           | December 3       | 9:33 AM  | 39.49367 | -81.29796 |
| 41  | Wingett Run                 | December 3       | 10:03 AM | 39.54626 | -81.24157 |
| 42  | Mill Run                    | December 3       | 10:48 AM | 39.38375 | -81.37831 |
| 43  | Williams Creek              | December 3       | 11:12 AM | 39.39338 | -81.44690 |
| 44  | Williams Creek (dup.)       | -                | -        | -        | -         |
| 45  | Briscoe Run                 | December 3       | 11:37 AM | 39.34701 | -81.53130 |
| 46  | Pond Run                    | December 3       | 11:51 AM | 39.31066 | -81.54963 |

**Table S11.** Sample metadata for soil samples.

| Description          | Date             | Time     | Latitude | Longitude |
|----------------------|------------------|----------|----------|-----------|
| Little Hocking A     | 2004             |          |          |           |
| Little Hocking B     | 2004             |          |          |           |
| Little Hocking C     | 2004             |          |          |           |
| Veto Lake            | December 1, 2016 | 10:08 AM | 39.34103 | -81.65669 |
| Strouds Run          | December 1, 2016 | 2:43 PM  | 39.37151 | -81.79150 |
| Drag Strip Road      | December 1, 2016 | 4:42 PM  | 39.29040 | -81.63393 |
| Veto Road            | December 2, 2016 | 9:07 AM  | 39.34776 | -81.55866 |
| Veto Road (dup.)     | -                | -        | -        | -         |
| Lookout Park         | December 2, 2016 | 11:31 AM | 39.41929 | -81.47079 |
| Archers Fork #1      | December 3, 2016 | 9:10 AM  | 39.46487 | -81.34868 |
| Archers Fork #2      | December 3, 2016 | 10:06 AM | 39.54603 | -81.24160 |
| Reinersville         | March 25, 2018   | 2:10 PM  | 39.67770 | -81.65041 |
| L. Olive Green Creek | March 25, 2018   | 2:37 PM  | 39.62830 | -81.64319 |
| Beverly              | March 25, 2018   | 2:59 PM  | 39.55756 | -81.64460 |
| Watertown            | March 25, 2018   | 5:51 PM  | 39.48623 | -81.63364 |
| Veto Lake            | March 25, 2018   | 6:30 PM  | 39.34098 | -81.65685 |
| Veto Lake (dup.)     | -                | -        | -        | -         |
| LHWA                 | March 25, 2018   | 6:55 PM  | 39.28067 | -81.66475 |
